# Supplementary material
Source: HighWire-hosted journal article supplement (https://bmjopen.bmj.com/content/14/10/e083263)
Supplement: inline-supplementary-material-1 [file inline-supplementary-material-1.pdf]

Supplementary figures

**Supplementary 1.** Survey on general practitioners' knowledge, attitudes, practice, and needs around UTI care.

*Dear general practitioner, this questionnaire is about your opinion, knowledge, and attitudes on UTIs.*

*Do not concern yourself with answering the questions in this questionnaire "correctly", but only with your **personal opinion**. This is very important to us!*

1. Please indicate the extent to which you agree with the following statements about the diagnosis and treatment of urinary tract infections.

|                                                                                                                                                                                | Completely disagree | Somewhat disagree | Neutral | Somewhat agree | Completely agree |
|--------------------------------------------------------------------------------------------------------------------------------------------------------------------------------|---------------------|-------------------|---------|----------------|------------------|
| If urine is handed in for symptoms <b>not</b> indicating a urinary tract infection, then I ignore the results of the urinalysis.                                               | 0                   | 0                 | 0       | 0              | 0                |
| With the current dipstick at the out-of-hours center I can diagnose a urinary tract infection with sufficient certainty.                                                       | 0                   | 0                 | 0       | 0              | 0                |
| I am less likely to initiate a urine culture at the <b>out-of-hours center</b> than at the regular hours center because I do not have access to the patient's complete record. | 0                   | 0                 | 0       | 0              | 0                |
| I am less likely to initiate a urine culture at the <b>out-of-hours center</b> than at the regular hours center because I am unable to follow-up with the patient.             | 0                   | 0                 | 0       | 0              | 0                |
| Point-of-care tests better than the current dipstick test are needed for diagnosing urinary symptoms.                                                                          | 0                   | 0                 | 0       | 0              | 0                |
| Better point-of-care tests for urinary tract infections may help me to prescribe in a more targeted way.                                                                       | 0                   | 0                 | 0       | 0              | 0                |

|                                                                                           |   |   |   |   |   |
|-------------------------------------------------------------------------------------------|---|---|---|---|---|
| Better point-of-care tests for urinary tract infections could save time in my daily work. | 0 | 0 | 0 | 0 | 0 |
| Physician assistants have sufficient knowledge on UTIs.                                   | 0 | 0 | 0 | 0 | 0 |
| General practitioners have sufficient knowledge on UTIs.                                  | 0 | 0 | 0 | 0 | 0 |

2. In the list below, please indicate which **combination of 2 symptoms** make the diagnosis of **urinary tract infection most** likely in healthy women.:  
*Select 2 symptoms from this list:*

- 0 Dysuria
- 0 Lower abdominal pain
- 0 Pollakisuria
- 0 Malodorous or turbid urine
- 0 Urge to urinate on empty bladder
- 0 Hematuria
- 0 Fever
- 0 Shivers
- 0 Absence of vaginal complaints

3. Statements about your handling of urinary tract infections:

|                                                                                                        | Never | Rarely | Sometimes | Often |
|--------------------------------------------------------------------------------------------------------|-------|--------|-----------|-------|
| When I diagnose a urinary tract infection in a healthy woman, I prescribe a delayed prescription.      | 0     | 0      | 0         | 0     |
| I am less likely to order a urinary culture at the <b>out-of-hours center</b> .                        | 0     | 0      | 0         | 0     |
| I am more likely to prescribe an antibiotic to unknown patients at the <b>out-of-hours center</b> .    | 0     | 0      | 0         | 0     |
| I refer patients with mictional complaints to <a href="http://www.thuisarts.nl">www.thuisarts.nl</a> . | 0     | 0      | 0         | 0     |

4. For the following statements, could you indicate whether, in your opinion, they are true or false?

*I am able to apply a urine culture at an out-of-hours center.*

0 Correct      0 Incorrect      0 I don't know

*A cystitis can resolve by drinking sufficiently and with the possible addition of painkillers.*

0 Correct      0 Incorrect      0 I don't know

*A urine culture is indicated in the case of a positive nitrite test in an elderly patient without micturition complaints.*

0 Correct      0 Incorrect      0 I don't know

*In patients with an indwelling catheter, changed odor or consistency of urine is a reason to perform diagnostics.*

0 Correct      0 Incorrect      0 I don't know

*In the case of non-specific complaints with a negative nitrite test, a UTI can be diagnosed with a positive leukocyte and erythrocyte test.*

0 Correct      0 Incorrect      0 I don't know

*At an out-of-hours center, a urine culture needs to be applied in patients with a positive nitrite test and signs of tissue invasion.*

0 Correct      0 Incorrect      0 I don't know

*At a regular hours center a urine culture needs to be applied in a patient with a positive nitrite test and signs of tissue invasion.*

0 Correct      0 Incorrect      0 I don't know

*At a regular hours clinic, a urine culture needs to be applied in a risk patient\* with a positive nitrite test.*

*\*(patients with kidney or urinary tract abnormalities, bladder function disorders, men, children <12y/o, and pregnant women)*

0 Correct      0 Incorrect      0 I don't know

*At an out-of-hours center a urine culture needs to be applied in a risk patient\* with a positive nitrite test.*

*\*(patients with kidney or urinary tract abnormalities, bladder function disorders, men, children <12y/o, and pregnant women)*

0 Correct      0 Incorrect      0 I don't know

**5. If a new diagnostic test for urinary tract infections were to be developed, what would be the most important requirements according to you?**

*Please prioritize by numbering 1 to 5, 1 indicating most important and 5 indicating least important. You can use each number only once.*

- ☐ Ease of use for the physician/physician assistant
- ☐ Limiting patient discomfort
- ☐ Time-to-result
- ☐ Diagnostic accuracy
- ☐ Cost

**6. In case of a suspected UTI at the out-of-hours center, which factors are most important for forming your decision to prescribe antibiotics?**

*Please prioritize by numbering 1 to 4, 1 indicating most important and 4 indicating least important. You can use each number only once.*

- ☐ Symptom recognition by patient
- ☐ Symptom recognition by physician
- ☐ Patient expectation
- ☐ Positive urine culture

**7. With which expectations do you think patients most often consult a physician when suspecting a UTI?**

*Please prioritize by numbering 1 to 5, 1 indicating most important and 5 indicating least important. You can use each number only once.*

- ☐ Obtaining a diagnosis
- ☐ Obtaining reassurance
- ☐ Obtaining an antibiotic prescription
- ☐ Obtaining additional examination
- ☐ Obtaining symptom relief

8. Name one aspect of UTI care that you feel could be improved.  
*Enter the most important aspect here, or leave the question unanswered if you feel the care cannot be improved:.*

Finally, a few brief questions about your background.

9. What is your age?
10. Wat is your gender?
11. What is your work situation?
- Practice owner
  - Locum
  - General practitioner in training
  - General practitioner and researcher in training
12. How many years of working experience as a general practitioner do you have?
13. On average, how many days per week do you work at a regular or out-of-hours center?
14. On average, how many shifts do you work at an out-of-hours center per year?
15. In which region do you currently spend most of your time working as a general practitioner?

If you have any other comments please post them here:

Thank you for your cooperation!

Supplementary 2. General practitioners’ knowledge about UTI care

| Statement                                                                                                                            | Correct<br>n (%) | Incorrect<br>n (%) | Didn't know<br>n (%) |
|--------------------------------------------------------------------------------------------------------------------------------------|------------------|--------------------|----------------------|
| <b>The use of urinary culture</b>                                                                                                    |                  |                    |                      |
| I am able to apply a urine culture at an out-of-hours center                                                                         | 176 (92.6)       | 9 (4.7)            | 5 (2.6)              |
| At a regular hours clinic, a urine culture needs to be applied in a risk patient with a positive nitrite test                        | 177 (93.2)       | 12 (6.3)           | 1 (0.5)              |
| At an out-of-hours center a urine culture needs to be applied in a risk patient with a positive nitrite test                         | 159 (83.7)       | 27 (14.2)          | 4 (2.1)              |
| At a regular hours center a urine culture needs to be applied in a patient with a positive nitrite test and signs of tissue invasion | 151 (79.5)       | 35 (18.4)          | 4 (2.1)              |
| At an out-of-hours center, a urine culture needs to be applied in patients with a positive nitrite test and signs of tissue invasion | 131 (68.9)       | 48 (25.3)          | 11 (5.8)             |
| <b>UTI in elderly patients</b>                                                                                                       |                  |                    |                      |
| A urine culture is indicated in the case of a positive nitrite test in an elderly patient without micturition complaints             | 109 (57.4)       | 61 (32.1)          | 20 (10.5)            |
| In patients with an indwelling catheter, changed odor or consistency of urine is a reason to perform diagnostics                     | 144 (75.8)       | 33 (17.4)          | 13 (6.8)             |

|                                                                                                                                             |            |           |         |
|---------------------------------------------------------------------------------------------------------------------------------------------|------------|-----------|---------|
| <b>Uncomplicated UTI</b>                                                                                                                    |            |           |         |
| In the case of non-specific complaints with a negative nitrite test, a UTI can be diagnosed with a positive leukocyte and erythrocyte test. | 135 (71.1) | 47 (24.7) | 8 (4.2) |
| A cystitis can resolve by drinking sufficiently and with the possible addition of painkillers                                               | 184 (96.8) | 4 (2.1)   | 2 (1.1) |

**Supplementary 3. GPs' opinions about UTI care**

| Statement                                                                                                                                                        | Agree<br>n (%) | Neutral<br>n (%) | Disagree<br>n (%) |
|------------------------------------------------------------------------------------------------------------------------------------------------------------------|----------------|------------------|-------------------|
| <b>Knowledge</b>                                                                                                                                                 |                |                  |                   |
| General practitioners have enough knowledge in regards to urinary tract infections.                                                                              | 144 (75.8)     | 26 (13.7)        | 20 (10.5)         |
| Doctors' assistants have enough knowledge in regards to urinary tract infections.                                                                                | 105 (55.3)     | 38 (20.0)        | 47 (24.7)         |
| <b>Point-of-care tests</b>                                                                                                                                       |                |                  |                   |
| Better point of care tests will be able to aid me to prescribe antibiotics more accurately.                                                                      | 138 (72.6)     | 21 (11.1)        | 31 (16.3)         |
| Better point of care tests will be able to save time during my daily work in the management of urinary tract infections.                                         | 114 (60.0)     | 40 (21.1)        | 36 (18.9)         |
| With the current dipstick test at an out of hours center, I will be able to diagnose an urinary tract infection with enough certainty.                           | 103 (54.2)     | 25 (13.2)        | 62 (32.6)         |
| Better point of care tests, other than the current dipstick, are needed for urinary tract infections.                                                            | 103 (54.2)     | 39 (20.5)        | 48 (25.3)         |
| I disregard the result of a urinalysis when an urine sample is submitted with symptoms that are not fitting a urinary tract infection.                           | 47 (24.7)      | 19 (10.0)        | 124 (65.3)        |
| <b>Urinary culture</b>                                                                                                                                           |                |                  |                   |
| At an out-of-hours center, I'm less likely to submit a urine culture compared to the regular hours center because I do not have access to the full medical file. | 72 (37.9)      | 13 (6.8)         | 105 (55.3)        |
| At an out-of-hours center, I'm less likely to submit a urine culture compared to the regular hours center because I'm unable to follow up on the patient.        | 53 (27.9)      | 12 (6.3)         | 125 (65.8)        |
